# Supplementary material
Source: publisher figshare collection journal article supplement (https://acs.figshare.com/ndownloader/files/3872716)
Supplement: Supplementary file 1 [file 3872716]

# Supplementary Information

## **The Supramolecular Structure of Self-Assembled Monolayers of Ferrocenyl Terminated $n$ -Alkanethiolates on Gold Surfaces**

*Nisachol Nerngchamnong, Hairong Wu, Kai Sotthewes, Li Yuan, Liang Cao, Max Roemer, Jiong Lu,  
Kian Ping Loh, Cedric Troadec, Harold J. W. Zandvliet, and Christian A. Nijhuis*

## **Fabrication of Au substrates**

**Preparation of the hydrogen flame annealed Au substrates.** The Au substrates (250 nm of Au with a 2.5 nm Cr adhesion layer on glass) were purchased from Arrandee (Germany). The Au substrates were hydrogen flame annealed for 3-5 min to remove organic contaminants and to reconstruct the Au surface to yield large atomically-flat terraces of Au(111).<sup>1,2</sup> After annealing, the surfaces were immediately used (after cooling down to room temperature) to minimize contamination from the ambient.

**Preparation of the template stripped (TS) Au substrates.** We followed procedures described in the literature<sup>3</sup> to fabricate Au<sup>TS</sup> surfaces for CV and HREELS measurements. Glass slides of  $1 \times 1 \text{ cm}^2$  (7105 Microscope slide, 1 mm thick) were cleaned by a mixture solution of  $\text{HCl}:\text{H}_2\text{O}_2:\text{H}_2\text{O} = 1:1:5$  at 70 °C for 20 min, then washed with  $\text{H}_2\text{O}$  and EtOH, and blown to dryness in a stream of stream of  $\text{N}_2$  gas. We further cleaned the glass slides by a plasma of air for 5 min at a pressure of 0.7 mbar. Afterward, the glass slides were glued against the Au surface deposited on Si/SiO<sub>2</sub> wafer using an optical adhesive (OA; Norland, No. 61). The OA was cured in ultraviolet light for 1 h using a light source of 100 Watt at a distance of 40 cm from the substrate. The glass-OA-metal composite was cleaved off from the Si/SiO<sub>2</sub> wafer using a razor blade and use immediately to minimize contamination from the ambient.

## **Near edge X-ray absorption fine structure (NEXAFS) spectroscopy**

We followed the previously reported procedure to acquire and process NEXAFS data.<sup>4</sup> Here we gave a brief description. NEXAFS spectroscopy was carried out at the SINS (Surface, Interface and Nanostructure Science) beamline of the Singapore Synchrotron Light Source (SSLS). The base pressure of the ultrahigh vacuum (UHV) chamber was  $1 \times 10^{-10}$  mbar and all the

measurements were performed at room temperature. We collected the angular dependent C *K*-edge NEXAFS spectra. At least 90% linear polarization factor of the X-ray beam was generated by synchrotron light source. The photon energy of the incident X-ray was calibrated using sputtering cleaned gold foil as reference with the photon energy resolution of 200 meV. We used two different angles to determine the molecular orientations: normal incidence ( $\theta = 90^\circ$ ) and grazing incidence ( $\theta = 20^\circ$ ). The two NEXAFS spectra were first normalized to the clean NEXAFS spectrum monitored using the same mode on fresh sputtering cleaned Au foil, and then normalized to have the same absorption edge jump between 280 eV and 320 eV. The two lowest resonances located at 285.4 eV ( $4e_{1g}$ ) and 286.9 eV ( $3e_{2u}$ ) are attributed to the transition to the  $\pi^*$  orbitals associated with the cyclopentadiene (Cp) rings of Fc with different symmetry. The molecular axis of Fc is perpendicular to the Cp ring plane. The angular dependence of the intensity of the Fc  $\pi^*$  resonances can be expressed by eq. 1, where  $\alpha$  is the tilt angle of Fc unit with respect to the surface normal, corresponding to the angle between the plane of Cp ring and the substrate surface plane,  $A$  is the normalization factor,  $P$  ( $= 0.9$ ) is the degree of linear polarization. By evaluating the intensity ratio at normal incidence ( $\theta = 90^\circ$ ) and grazing incidence ( $\theta = 20^\circ$ ), the tilt angle of Fc unit,  $\alpha$  can be derived.

$$I(\theta) = \frac{1}{3}AP \left[ 1 + \frac{1}{2}(3\cos^2\theta - 1)(3\cos^2\alpha - 1) \right] + \frac{1}{2}A(1 - P)\sin^2\alpha \quad (1)$$

### **X-ray single crystal diffraction**

Experimental details of the crystal structure determination of HSC<sub>3</sub>Fc and HSC<sub>4</sub>Fc by X-ray single crystal diffraction are summarized in Table S1.

**Table S1.** Crystal data and structure refinement for HSC<sub>3</sub>Fc and HSC<sub>4</sub>Fc.

| Crystal data                      |                                                                                                                 |                                                                                                                  |
|-----------------------------------|-----------------------------------------------------------------------------------------------------------------|------------------------------------------------------------------------------------------------------------------|
| Identification code               | HSC <sub>3</sub> Fc                                                                                             | HSC <sub>4</sub> Fc                                                                                              |
| Empirical formula                 | C <sub>13</sub> H <sub>16</sub> FeS                                                                             | C <sub>14</sub> H <sub>18</sub> FeS                                                                              |
| Formula weight                    | 260.17                                                                                                          | 274.19                                                                                                           |
| Temperature                       | 100(2) K                                                                                                        | 100(2) K                                                                                                         |
| Wavelength                        | 0.71073 Å                                                                                                       | 0.71073 Å                                                                                                        |
| Crystal system                    | Monoclinic                                                                                                      | Monoclinic                                                                                                       |
| Space group                       | P2(1)/c                                                                                                         | P2(1)/c                                                                                                          |
| Unit cell dimensions              | a = 12.134(2) Å, $\alpha$ = 90°.<br>b = 7.6542(14) Å, $\beta$ = 108.447(3)°<br>c = 12.877(2) Å, $\gamma$ = 90°. | a = 7.1738(6) Å, $\alpha$ = 90°.<br>b = 8.6460(6) Å, $\beta$ = 98.756(3)°.<br>c = 20.1903(16) Å, $\gamma$ = 90°. |
| Volume                            | 1134.4(4) Å <sup>3</sup>                                                                                        | 1237.70(17) Å <sup>3</sup>                                                                                       |
| Z                                 | 4                                                                                                               | 4                                                                                                                |
| Density (calculated)              | 1.523 Mg/m <sup>3</sup>                                                                                         | 1.471 Mg/m <sup>3</sup>                                                                                          |
| Absorption coefficient            | 1.474 mm <sup>-1</sup>                                                                                          | 1.355 mm <sup>-1</sup>                                                                                           |
| F(000)                            | 544                                                                                                             | 576                                                                                                              |
| Crystal size                      | 0.20 x 0.10 x 0.02 mm <sup>3</sup>                                                                              | 0.36 x 0.20 x 0.10 mm <sup>3</sup>                                                                               |
| Theta range for data collection   | 1.77 to 27.50°.                                                                                                 | 2.57 to 27.49°.                                                                                                  |
| Index ranges                      | -15 ≤ h ≤ 9, -9 ≤ k ≤ 9, -15 ≤ l ≤ 16                                                                           | -9 ≤ h ≤ 9, -11 ≤ k ≤ 11, -26 ≤ l ≤ 26                                                                           |
| Reflections collected             | 7409                                                                                                            | 20744                                                                                                            |
| Independent reflections           | 2605 [R <sub>(int)</sub> = 0.0395]                                                                              | 2836 [R <sub>(int)</sub> = 0.0496]                                                                               |
| Completeness to theta = 27.50°    | 100.00%                                                                                                         | 99.60%                                                                                                           |
| Absorption correction             | Semi-empirical from equivalents                                                                                 | Semi-empirical from equivalents                                                                                  |
| Max. and min. transmission        | 0.9711 and 0.7569                                                                                               | 0.8372 and 0.6860                                                                                                |
| Refinement method                 | Full-matrix least-squares on F <sup>2</sup>                                                                     | Full-matrix least-squares on F <sup>2</sup>                                                                      |
| Data / restraints / parameters    | 2605 / 0 / 139                                                                                                  | 2836 / 0 / 149                                                                                                   |
| Goodness-of-fit on F <sup>2</sup> | 1.14                                                                                                            | 1.112                                                                                                            |
| Final R indices [I > 2sigma(I)]   | R <sub>1</sub> = 0.0467, wR <sub>2</sub> = 0.1092                                                               | R <sub>1</sub> = 0.0508, wR <sub>2</sub> = 0.1636                                                                |
| R indices (all data)              | R <sub>1</sub> = 0.0516, wR <sub>2</sub> = 0.1186                                                               | R <sub>1</sub> = 0.0609, wR <sub>2</sub> = 0.1693                                                                |
| Largest diff. peak and hole       | 0.955 and -0.607 e.Å <sup>-3</sup>                                                                              | 1.776 and -0.537 e.Å <sup>-3</sup>                                                                               |

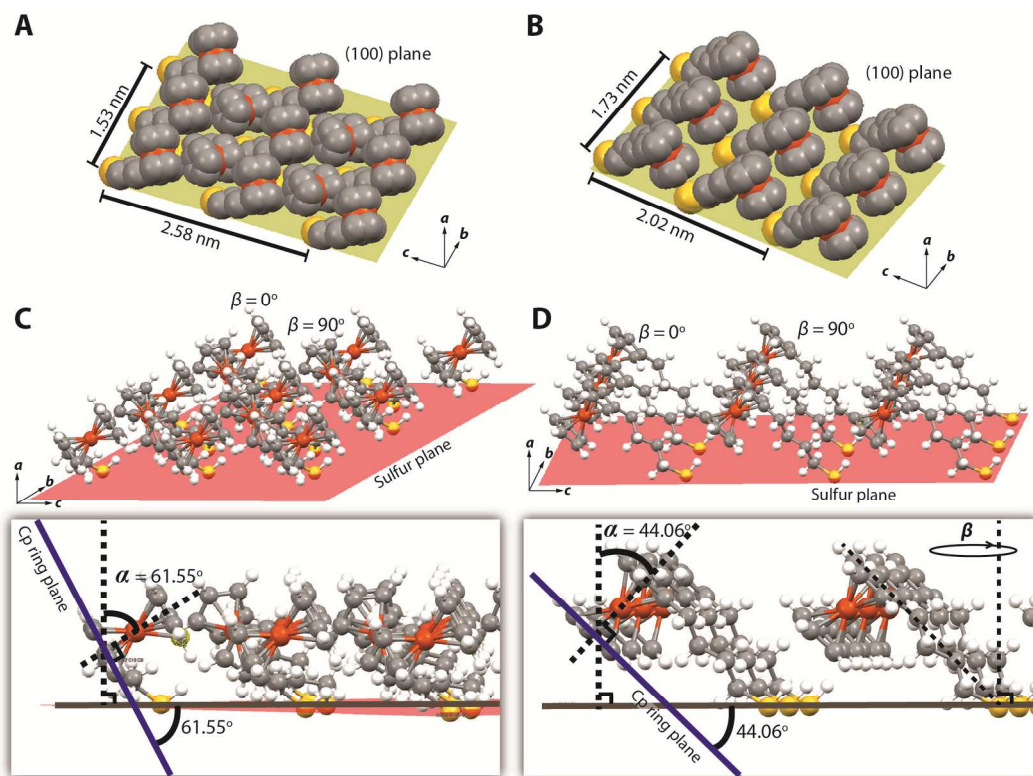

**Figure S1.** The crystal structures of the HSC<sub>3</sub>Fc (A) and the HSC<sub>4</sub>Fc (B) molecules obtained by single-crystal X-ray diffraction. The molecules are projected in the *bc*-plane showing the sulfur plane and Cp ring plane. The  $\alpha$  values for HSC<sub>3</sub>Fc (C) and HSC<sub>4</sub>Fc (D) are 61.55° and 44.06°, respectively. The  $\beta$  values change by 90° between rows of molecules.

Figure S1 shows the crystal structures of HSC<sub>3</sub>Fc (Fig. S1A and C) and HSC<sub>4</sub>Fc (Fig. S2B and D) as determined by X-ray crystallography and shows the arrangement of the molecules of the bulk crystal in the *bc*-plane, also referred as the (100)-crystal plane. The unit cells of both HSC<sub>3</sub>Fc and HSC<sub>4</sub>Fc in their crystal structure are rectangles (the dihedral angle between two sides of the unit cell, defined as  $\gamma$  (°), is 90°). The Fc units pack edge-to-face (EF), in the so-called T shape conformation, for the HSC<sub>3</sub>Fc bulk crystal, whereas they pack in a nearly parallel face-to-face (FF) alignment for the HSC<sub>4</sub>Fc bulk crystal. The different Fc orientations between

rows of molecules in the crystal of both HSC<sub>3</sub>Fc and HSC<sub>4</sub>Fc are caused by the difference in azimuthal, or twist angle ( $\beta$ )<sup>5</sup>, angle of the carbon back-bone chain. The unit cell of HSC<sub>3</sub>Fc occupies an area of 3.95 nm<sup>2</sup> (a dimension of 1.53 nm  $\times$  2.58 nm) with eight molecules, while the unit cell of HSC<sub>4</sub>Fc occupies an area of 3.49 nm<sup>2</sup> (a dimension of 1.73  $\times$  2.02 nm) with only four molecules. The packing density of HSC<sub>3</sub>Fc (2.03 molecule/nm<sup>2</sup> or  $3.4 \times 10^{-10}$  mol/cm<sup>2</sup>) is about two times higher than that of HSC<sub>4</sub>Fc (1.17 molecule/nm<sup>2</sup> or  $1.9 \times 10^{-10}$  mol/cm<sup>2</sup>).

## References

- 
- (1) Wu, H.; Sotthewes, K.; Kumar, A.; Vancso, G. J.; Schon, P. M.; Zandvliet, H. J. W. *Langmuir* **2013**, *29*, 2250.
  - (2) Sotthewes, K.; Wu, H.; Kumar, A.; Vancso, G. J.; Schon, P. M.; Zandvliet, H. J. W. *Langmuir* **2013**, *29*, 3662.
  - (3) Weiss, E. A.; Chiechi, R. C.; Kaufman, G. K.; Kriebel, J. K.; Li, Z.; Duati, M.; Rampi, M. A.; Whitesides, G. M. *J. Am. Chem. Soc.* **2007**, *129*, 4336.
  - (4) Nerngchamnong, N.; Yuan, L.; Qi, D. C.; Li, J.; Thompson, D.; Nijhuis, C. A. *Nat. Nanotechnol.* **2013**, *8*, 113.
  - (5) Tao, F.; Bernasek, S. L. *Chem. Rev.* **2007**, *107*, 1408.
